# Supplementary material for: Inhibition of NUCKS Facilitates Corneal Recovery Following Alkali Burn
Source: PubMed Central journal article supplement (PMC5247723; doi:10.1038/srep41224), 2017-01-20
Supplement: srep41224-s1.pdf [file srep41224-s1.pdf]

## **Inhibition of NUCKS Facilitates Corneal Recovery Following Alkali Burn**

Ming-Wai Poon<sup>1-3</sup>, Dan Jiang<sup>3</sup>, Peng Qin<sup>3</sup>, Yuelin Zhang<sup>3</sup>, Beiyong Qiu<sup>4</sup>, Sumit Chanda<sup>5</sup>, Vinay Tergaonkar<sup>4</sup>, Qing Li<sup>3</sup>, Ian Y. Wong<sup>3</sup>, Zhendong Yu<sup>6</sup>, Hung-Fat Tse<sup>1</sup>, David SH Wong<sup>3</sup>, and \*Qizhou Lian<sup>1-3\*</sup>.

### **(Supplementary Information)**

#### **This file contains**

- 1. Supplementary Figure S1**
- 2. Supplementary Figure S2**
- 3. Supplementary Table 1**
- 4. Figure Legend for Supplementary Figure S1**
- 5. Figure Legend for Supplementary Figure S2 and**
- 6. Figure Legend for Supplementary Table 1.**

Supplementary Figure- S1

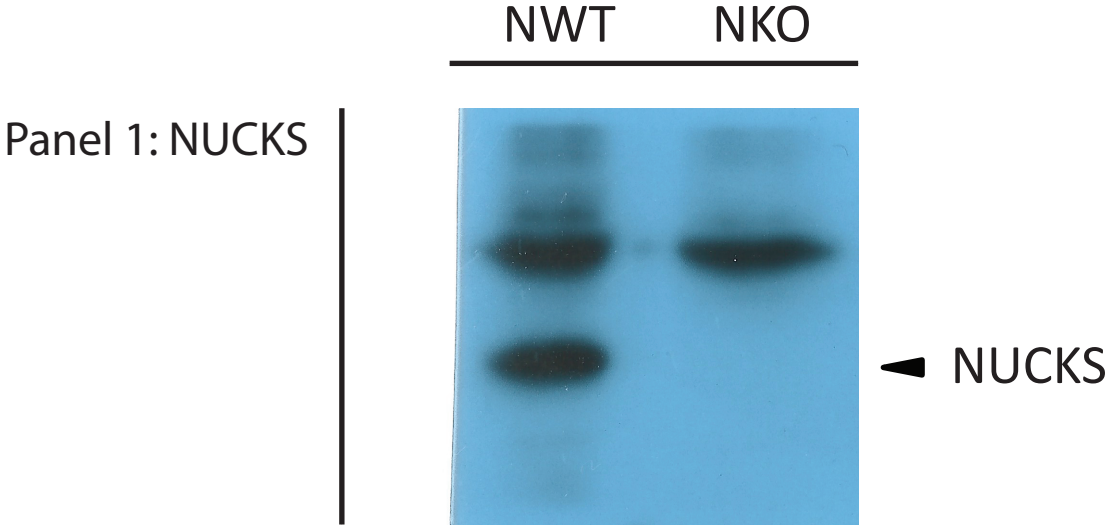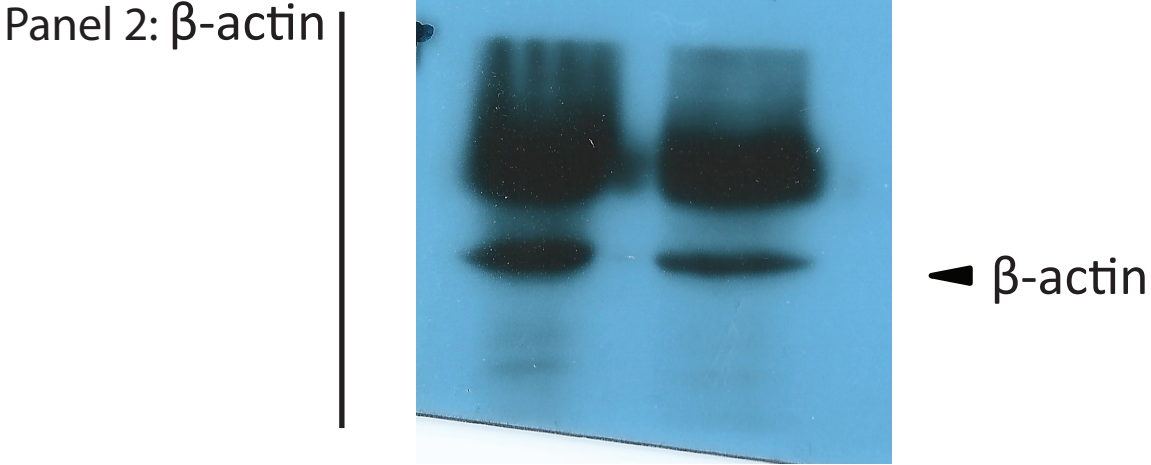

(Full-length gel image)

# Supplementary Figure- S2

**A** **i**

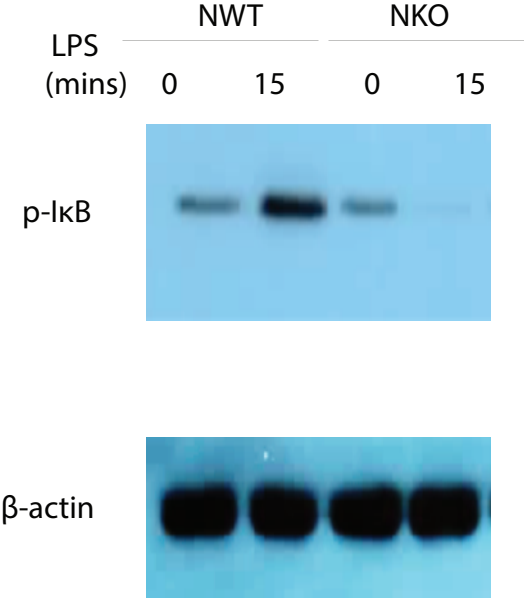

**B** **i**

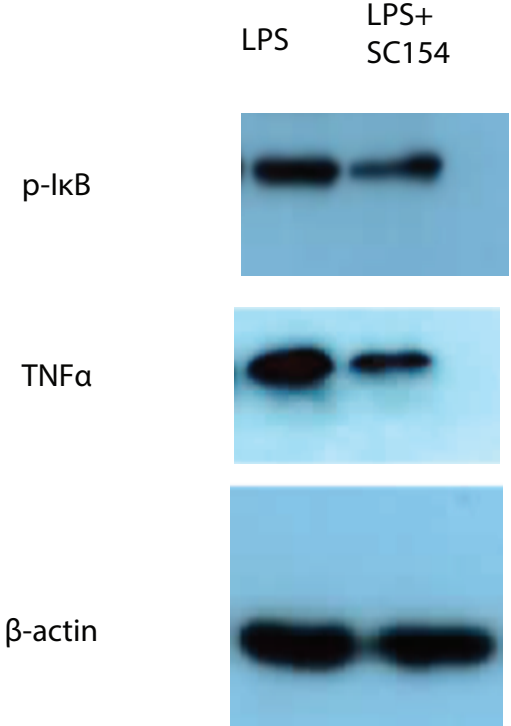

(Full-length gel image)

**Supplementary Table 1: Primers for Real-time RT PCR.**

| <b>Primers</b>                 |                                             |                                  |                                      |
|--------------------------------|---------------------------------------------|----------------------------------|--------------------------------------|
| <b>Transcripts</b>             | <b>Accession Number</b>                     | <b>Forward Primer<br/>5'→3'</b>  | <b>Reverse Primer<br/>5'→3'</b>      |
| <b>Immflammatory Cytokines</b> |                                             |                                  |                                      |
| mIL1A                          | NM010554.4                                  | GAC AGT<br>ATC AGC<br>AAC GTC AA | TCA CTC<br>TGG TAG<br>GTG TAA GG     |
| mIL1B                          | NM008361.3                                  | GAG TGT<br>GGA TCC<br>CAA GCA AT | TAC CAG<br>TTG GGG<br>AAC TCT GC     |
| <b>Angiogenesis Cytokines</b>  |                                             |                                  |                                      |
| mVEGF                          | NM_001025250.3, NM_009505.4, NM_001025257.3 | CCC GAC<br>GAG ATA<br>GAG TAC AT | CTG GCT<br>TTG GTG<br>AGG TTT        |
| mPEDF                          | NM011340.3                                  | CCC GAC<br>TTC AGC<br>AAG ATT AC | CCC TCA<br>GAA CAA<br>AGA GGA<br>AAG |
| <b>House Keeping</b>           |                                             |                                  |                                      |
| GAPDH                          | NM008084.2                                  | CCA CTC<br>ACG GCA<br>AAT TCA    | AGT AGA<br>CTC CAC<br>GAC ATA<br>CTC |

Keys: m=mouse

**Figure Legends:**

**Supplementary Figure 1. Confirmation of Genotypes of Mice for NWT and NKO by Western Blot Analysis.** Specific antibody for NUCKS (Abcam 1:100) was used to confirm the genotypes.

**Supplementary Figure 2. Full Gel Images of Western Blot Analysis of Figure 8A and 8B.**

**Supplementary Table 1. Details of the Specific Primers for Various Cytokines for Real Time –RT-PCR Analysis.** This table shows the sequences and specific information for the sense and anti-sense primers for inflammatory cytokines (IL1A and IL1B), angiogenic and antiangiogenic cytokines (VEGF & PEDF, respectively) and the house-keeping gene (GAPDH).
